# Supplementary material for: The immune landscape during the tumorigenesis of cervical cancer
Source: PubMed Central journal article supplement (PMC7982625; doi:10.1002/cam4.3833), 2021-03-10

**Figure S4**

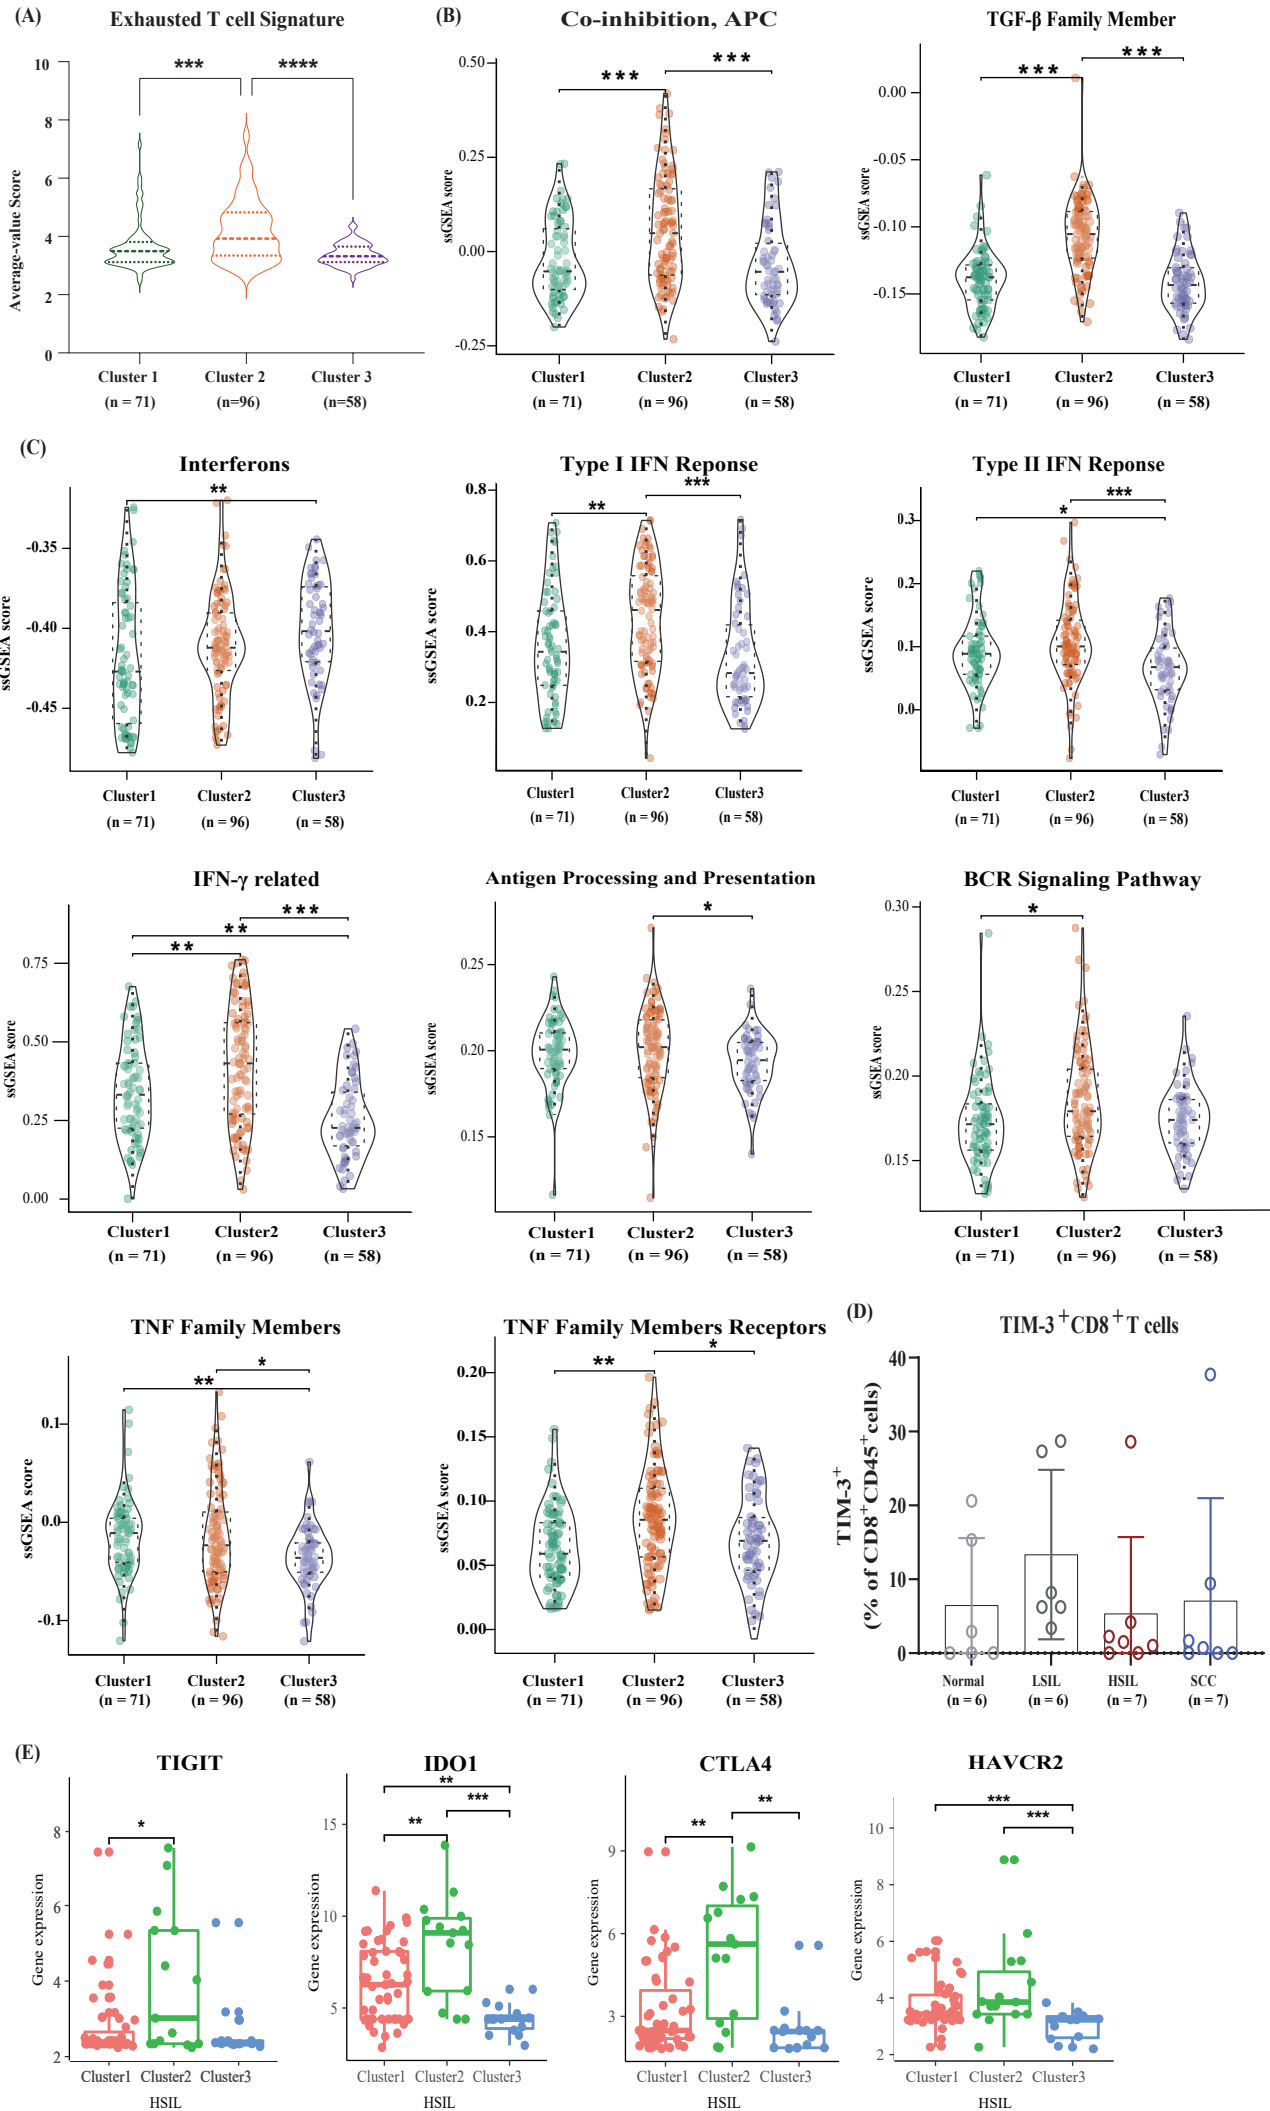

Supplement: CAM4-10-2380-s004.pdf [file CAM4-10-2380-s004.pdf]
